# Supplementary material for: Prefrontal Cortex Response to Prenatal Insult and Postnatal Opioid Exposure
Source: MDPI journal article supplement (doi:10.3390/genes13081371), 2022-07-30
Supplement: s1 [file s1]

## Supplemental Tables and Figures

**Supplementary Table S1.** Log2(fold change) (FC) and False Discovery Rat  $\times 10$ -adjusted P-value (FDR) of genes in the prefrontal cortex that presented at least one significant (FDR P-value  $< 0.05$ , and a  $|\log_2(\text{fold change})| > 1.2$ ) effect for the main effects and interactions (x) between morphine (M), maternal immune activation (A), and sex (S).

| Symbol     | A $\times$ M |                     | A    |                     | M    |                     | A $\times$ S |                    | M $\times$ S |                     | S  |     |
|------------|--------------|---------------------|------|---------------------|------|---------------------|--------------|--------------------|--------------|---------------------|----|-----|
|            | FC           | FDR                 | FC   | FDR                 | FC   | FDR                 | FC           | FDR                | FC           | FDR                 | FC | FDR |
| ADGRE1     |              |                     | 7.7  | $1 \times 10^{-10}$ |      |                     |              |                    | 2.9          | $1 \times 10^{-8}$  |    |     |
| ADGRG3     |              |                     |      |                     |      |                     | -1.8         | $2 \times 10^{-3}$ |              |                     |    |     |
| AMBN       |              |                     | 1.8  | $1 \times 10^{-10}$ |      |                     |              |                    |              |                     |    |     |
| AQP1       |              |                     |      |                     |      |                     |              |                    | -1.2         | $1 \times 10^{-3}$  |    |     |
| ARG1       | -1.6         | $1 \times 10^{-10}$ |      |                     |      |                     | 2.2          | $7 \times 10^{-5}$ | 2.5          | $1 \times 10^{-10}$ |    |     |
| ATF3       |              |                     | 1.3  | $1 \times 10^{-10}$ |      |                     |              |                    |              |                     |    |     |
| B2M        |              |                     | 1.2  | $1 \times 10^{-10}$ |      |                     |              |                    |              |                     |    |     |
| BATF2      |              |                     | 2.3  | $1 \times 10^{-10}$ |      |                     |              |                    |              |                     |    |     |
| BCL2L14    |              |                     | 1.9  | $1 \times 10^{-10}$ |      |                     |              |                    |              |                     |    |     |
| BST2       |              |                     | 1.6  | $1 \times 10^{-10}$ |      |                     |              |                    |              |                     |    |     |
| BTNL9      |              |                     | 1.2  | $1 \times 10^{-10}$ |      |                     |              |                    |              |                     |    |     |
| C1H15orf48 |              |                     |      |                     |      |                     |              |                    | 1.5          | $1 \times 10^{-3}$  |    |     |
| C2         |              |                     | 2.5  | $1 \times 10^{-10}$ |      |                     |              |                    |              |                     |    |     |
| C4BPA-2    |              |                     | 3.6  | $1 \times 10^{-10}$ | -3.1 | $1 \times 10^{-10}$ |              |                    | -2.4         | $1 \times 10^{-3}$  |    |     |
| C7         | 1.4          | $1 \times 10^{-10}$ |      |                     |      |                     |              |                    |              |                     |    |     |
| CCL2       |              |                     | 2.1  | $1 \times 10^{-10}$ | -1.4 | $1 \times 10^{-10}$ | 1.6          | $2 \times 10^{-3}$ |              |                     |    |     |
| CCL4       |              |                     | 1.7  | $1 \times 10^{-10}$ | -1.4 | $1 \times 10^{-10}$ |              |                    |              |                     |    |     |
| CCL5       |              |                     | 2.9  | $1 \times 10^{-10}$ |      |                     |              |                    |              |                     |    |     |
| CCL8       |              |                     | 1.3  | $1 \times 10^{-10}$ |      |                     |              |                    |              |                     |    |     |
| CCR1       |              |                     |      |                     |      |                     |              |                    | 1.9          | $1 \times 10^{-10}$ |    |     |
| CCR2       |              |                     | 2.1  | $1 \times 10^{-10}$ |      |                     |              |                    |              |                     |    |     |
| CD163      |              |                     | 3.0  | $1 \times 10^{-10}$ |      |                     |              |                    | 2.1          | $1 \times 10^{-10}$ |    |     |
| CD2        |              |                     | 3.2  | $1 \times 10^{-10}$ |      |                     |              |                    |              |                     |    |     |
| CD274      |              |                     | 1.4  | $1 \times 10^{-10}$ |      |                     |              |                    |              |                     |    |     |
| CD300LF    |              |                     | 1.3  | $1 \times 10^{-10}$ |      |                     |              |                    |              |                     |    |     |
| CD3E       |              |                     | 2.5  | $1 \times 10^{-10}$ |      |                     |              |                    |              |                     |    |     |
| CD3G       |              |                     | 3.0  | $1 \times 10^{-10}$ |      |                     |              |                    |              |                     |    |     |
| CD48       |              |                     | 1.7  | $1 \times 10^{-10}$ |      |                     |              |                    |              |                     |    |     |
| CD52       |              |                     | 2.5  | $1 \times 10^{-10}$ |      |                     | 2.2          | $3 \times 10^{-3}$ |              |                     |    |     |
| CD5L       |              |                     | 1.2  | $1 \times 10^{-10}$ |      |                     |              |                    | -2.3         | $5 \times 10^{-6}$  |    |     |
| CD6        |              |                     | 1.9  | $1 \times 10^{-10}$ |      |                     |              |                    |              |                     |    |     |
| CD74       |              |                     | 2.6  | $1 \times 10^{-10}$ |      |                     |              |                    | -1.6         | $1 \times 10^{-10}$ |    |     |
| CHI3L1     |              |                     |      |                     |      |                     |              |                    | 1.7          | $7 \times 10^{-5}$  |    |     |
| CRABP1     |              |                     | -1.5 | $1 \times 10^{-10}$ |      |                     |              |                    |              |                     |    |     |
| CRABP2     | 1.9          | $1 \times 10^{-10}$ | -2.4 | $1 \times 10^{-10}$ | -1.9 | $1 \times 10^{-10}$ |              |                    | -1.3         | $5 \times 10^{-2}$  |    |     |
| CSF2RB     |              |                     |      |                     |      |                     |              |                    | 1.6          | $4 \times 10^{-6}$  |    |     |
| CSF3R      | -1.8         | $1 \times 10^{-10}$ |      |                     | -1.2 | $1 \times 10^{-10}$ | 1.7          | $1 \times 10^{-2}$ | 2.4          | $3 \times 10^{-9}$  |    |     |
| CTSS       |              |                     | 1.4  | $1 \times 10^{-10}$ |      |                     |              |                    |              |                     |    |     |

|          |      |                     |      |                     |      |                     |      |                     |      |                     |      |                     |  |
|----------|------|---------------------|------|---------------------|------|---------------------|------|---------------------|------|---------------------|------|---------------------|--|
| CTSW     |      |                     | 2.3  | $1 \times 10^{-10}$ |      |                     |      |                     |      |                     |      |                     |  |
| CXCL10   |      |                     | 4.7  | $1 \times 10^{-10}$ |      |                     | 1.7  | $4 \times 10^{-8}$  |      |                     |      |                     |  |
| CXCL11   |      |                     | 4.9  | $1 \times 10^{-10}$ |      |                     |      |                     |      |                     |      |                     |  |
| CXCL9    |      |                     | 5.5  | $1 \times 10^{-10}$ |      |                     |      |                     | -2.2 | $5 \times 10^{-6}$  |      |                     |  |
| CYTIP    |      |                     | 1.8  | $1 \times 10^{-10}$ |      |                     |      |                     |      |                     |      |                     |  |
| DDX60    |      |                     | 2.6  | $1 \times 10^{-10}$ |      |                     |      |                     | -1.4 | $7 \times 10^{-8}$  |      |                     |  |
| DHX58    |      |                     | 2.0  | $1 \times 10^{-10}$ |      |                     |      |                     |      |                     |      |                     |  |
| DNTT     |      |                     | 1.4  | $1 \times 10^{-10}$ |      |                     |      |                     |      |                     |      |                     |  |
| DSP      | 1.3  | $1 \times 10^{-10}$ | -1.5 | $1 \times 10^{-10}$ | -1.3 | $1 \times 10^{-10}$ |      |                     |      |                     |      |                     |  |
| EIF1AY   |      |                     |      |                     |      |                     | -5.0 | $1 \times 10^{-10}$ | 6.8  | $1 \times 10^{-10}$ | -8.9 | $1 \times 10^{-10}$ |  |
| EMILIN2  |      |                     |      |                     |      |                     |      |                     | 1.7  | $5 \times 10^{-8}$  |      |                     |  |
| EOMES    |      |                     | 1.5  | $1 \times 10^{-10}$ |      |                     |      |                     |      |                     |      |                     |  |
| EPSTI1   |      |                     | 2.0  | $1 \times 10^{-10}$ |      |                     |      |                     |      |                     |      |                     |  |
| ETV7     |      |                     | 1.2  | $1 \times 10^{-10}$ |      |                     |      |                     |      |                     |      |                     |  |
| F13A1    |      |                     |      |                     |      |                     | 1.4  | $1 \times 10^{-6}$  | 2.2  | $1 \times 10^{-10}$ |      |                     |  |
| FAM167B  |      |                     | 2.0  | $1 \times 10^{-10}$ |      |                     |      |                     | 1.5  | $3 \times 10^{-2}$  |      |                     |  |
| FAM26F   |      |                     | 1.4  | $1 \times 10^{-10}$ |      |                     |      |                     |      |                     |      |                     |  |
| FCGR2B   |      |                     | 2.3  | $1 \times 10^{-10}$ |      |                     |      |                     |      |                     |      |                     |  |
| FCN1     |      |                     | 2.4  | $1 \times 10^{-10}$ | -1.6 | $1 \times 10^{-10}$ |      |                     | 3.4  | $1 \times 10^{-10}$ |      |                     |  |
| GBP1     |      |                     | 3.0  | $1 \times 10^{-10}$ |      |                     | 1.6  | $1 \times 10^{-10}$ | -1.2 | $1 \times 10^{-10}$ |      |                     |  |
| GDPD1    | -1.6 | $1 \times 10^{-10}$ | 2.0  | $1 \times 10^{-10}$ |      |                     |      |                     |      |                     |      |                     |  |
| GNLY     |      |                     | 2.9  | $1 \times 10^{-10}$ | -1.2 | $1 \times 10^{-10}$ |      |                     |      |                     |      |                     |  |
| GPR84    | -2.0 | $1 \times 10^{-10}$ | 2.4  | $1 \times 10^{-10}$ | -1.8 | $1 \times 10^{-10}$ | 2.4  | $7 \times 10^{-6}$  | 3.2  | $1 \times 10^{-10}$ | -1.3 | $2 \times 10^{-8}$  |  |
| GVIN1    |      |                     | 2.2  | $1 \times 10^{-10}$ |      |                     |      |                     |      |                     |      |                     |  |
| GZMA-2   |      |                     | 4.5  | $1 \times 10^{-10}$ |      |                     |      |                     |      |                     |      |                     |  |
| GZMB     |      |                     | 4.3  | $1 \times 10^{-10}$ | -1.5 | $2 \times 10^{-3}$  |      |                     |      |                     |      |                     |  |
| HERC5    |      |                     | 2.5  | $1 \times 10^{-10}$ |      |                     |      |                     |      |                     |      |                     |  |
| HERC6    |      |                     | 1.4  | $1 \times 10^{-10}$ |      |                     |      |                     |      |                     |      |                     |  |
| IDO1     |      |                     |      |                     | -2.1 | $1 \times 10^{-10}$ | 2.0  | $5 \times 10^{-3}$  |      |                     |      |                     |  |
| IER3     |      |                     |      |                     |      |                     |      |                     | 1.9  | $2 \times 10^{-6}$  |      |                     |  |
| IFI44    |      |                     | 1.7  | $1 \times 10^{-10}$ |      |                     |      |                     |      |                     |      |                     |  |
| IFI44L   |      |                     | 1.6  | $1 \times 10^{-10}$ |      |                     |      |                     |      |                     |      |                     |  |
| IFI6     |      |                     | 2.0  | $1 \times 10^{-10}$ | -1.5 | $1 \times 10^{-10}$ |      |                     |      |                     |      |                     |  |
| IFIH1    |      |                     | 1.6  | $1 \times 10^{-10}$ |      |                     |      |                     |      |                     |      |                     |  |
| IFIT1    |      |                     | 1.8  | $1 \times 10^{-10}$ |      |                     |      |                     |      |                     |      |                     |  |
| IFIT3    |      |                     | 1.7  | $1 \times 10^{-10}$ |      |                     |      |                     |      |                     |      |                     |  |
| IFITM1   |      |                     | 2.4  | $1 \times 10^{-10}$ |      |                     |      |                     |      |                     |      |                     |  |
| IFITM3   |      |                     | 1.4  | $1 \times 10^{-10}$ |      |                     |      |                     |      |                     |      |                     |  |
| IL15RA   |      |                     | 1.4  | $1 \times 10^{-10}$ |      |                     |      |                     |      |                     |      |                     |  |
| IL2RB    |      |                     | 2.3  | $1 \times 10^{-10}$ |      |                     |      |                     |      |                     |      |                     |  |
| ISG12(A) |      |                     | 1.8  | $1 \times 10^{-10}$ | -1.3 | $1 \times 10^{-10}$ |      |                     |      |                     |      |                     |  |
| ISG15    |      |                     | 1.4  | $1 \times 10^{-10}$ |      |                     |      |                     |      |                     |      |                     |  |
| ISG20    |      |                     | 3.6  | $1 \times 10^{-10}$ |      |                     |      |                     |      |                     |      |                     |  |
| ITGB7    |      |                     | 1.9  | $1 \times 10^{-10}$ |      |                     |      |                     |      |                     |      |                     |  |
| JCHAIN   |      |                     | 1.3  | $1 \times 10^{-10}$ |      |                     |      |                     |      |                     |      |                     |  |

|              |      |                     |      |                     |      |                     |  |  |      |                     |      |                     |                     |                     |      |                     |                     |  |  |  |
|--------------|------|---------------------|------|---------------------|------|---------------------|--|--|------|---------------------|------|---------------------|---------------------|---------------------|------|---------------------|---------------------|--|--|--|
| KLRD1        |      |                     | 1.9  | $1 \times 10^{-10}$ |      |                     |  |  |      |                     |      |                     |                     |                     |      |                     |                     |  |  |  |
| KLRK1        |      |                     | 3.6  | $1 \times 10^{-10}$ |      |                     |  |  |      |                     |      |                     |                     |                     |      |                     |                     |  |  |  |
| KMO          |      |                     | 1.3  | $1 \times 10^{-10}$ |      |                     |  |  |      |                     |      |                     |                     |                     |      |                     |                     |  |  |  |
| KRT19        | 1.7  | $1 \times 10^{-10}$ | -1.7 | $1 \times 10^{-10}$ |      |                     |  |  |      |                     |      |                     |                     |                     |      |                     |                     |  |  |  |
| LCK          |      |                     | 3.1  | $1 \times 10^{-10}$ | -1.6 | $1 \times 10^{-10}$ |  |  |      |                     |      |                     |                     |                     |      |                     |                     |  |  |  |
| LGALS3BP     |      |                     | 1.6  | $1 \times 10^{-10}$ |      |                     |  |  |      |                     |      |                     |                     |                     |      |                     |                     |  |  |  |
| LGALS9       |      |                     | 1.8  | $1 \times 10^{-10}$ |      |                     |  |  |      |                     |      |                     |                     |                     |      |                     |                     |  |  |  |
| LOC100038329 |      |                     | 4.7  | $1 \times 10^{-10}$ |      |                     |  |  |      |                     |      | 3.1                 | $1 \times 10^{-10}$ |                     |      |                     |                     |  |  |  |
| LOC100125542 |      |                     | 5.2  | $1 \times 10^{-10}$ |      |                     |  |  |      |                     |      | 1.9                 | $3 \times 10^{-8}$  |                     |      |                     |                     |  |  |  |
| LOC100152327 |      |                     | 4.6  | $1 \times 10^{-10}$ |      |                     |  |  |      |                     |      | 2.2                 | $1 \times 10^{-10}$ |                     |      |                     |                     |  |  |  |
| LOC100153139 |      |                     | 2.9  | $1 \times 10^{-10}$ | -1.2 | $4 \times 10^{-8}$  |  |  |      |                     |      |                     |                     |                     |      |                     |                     |  |  |  |
| LOC100154053 | -1.2 | $1 \times 10^{-10}$ | 1.8  | $1 \times 10^{-10}$ |      |                     |  |  | 1.8  | $3 \times 10^{-2}$  |      |                     |                     |                     |      |                     |                     |  |  |  |
| LOC100155195 |      |                     | 2.5  | $1 \times 10^{-10}$ |      |                     |  |  | 1.2  | $1 \times 10^{-4}$  |      |                     |                     |                     |      |                     |                     |  |  |  |
| LOC100156073 |      |                     | 1.5  | $1 \times 10^{-10}$ |      |                     |  |  |      |                     |      |                     |                     |                     |      |                     |                     |  |  |  |
| LOC100158069 |      |                     | 1.9  | $1 \times 10^{-10}$ |      |                     |  |  |      |                     |      |                     |                     |                     |      |                     |                     |  |  |  |
| LOC100513601 |      |                     |      |                     |      |                     |  |  |      |                     |      | -2.4                | $1 \times 10^{-10}$ |                     |      |                     |                     |  |  |  |
| LOC100514479 |      |                     |      |                     |      |                     |  |  |      |                     |      |                     |                     |                     |      | 1.4                 | $3 \times 10^{-8}$  |  |  |  |
| LOC100514951 |      |                     | 1.4  | $1 \times 10^{-10}$ |      |                     |  |  |      |                     |      |                     |                     |                     |      |                     |                     |  |  |  |
| LOC100516039 |      |                     | 1.2  | $1 \times 10^{-10}$ |      |                     |  |  |      |                     |      |                     |                     |                     |      |                     |                     |  |  |  |
| LOC100516587 |      |                     |      |                     |      |                     |  |  |      |                     |      |                     |                     |                     |      | 1.6                 | $1 \times 10^{-10}$ |  |  |  |
| LOC100519082 |      |                     | 1.7  | $1 \times 10^{-10}$ | -1.3 | $1 \times 10^{-10}$ |  |  |      |                     |      |                     |                     |                     |      |                     |                     |  |  |  |
| LOC100519098 |      |                     | 1.5  | $1 \times 10^{-10}$ |      |                     |  |  |      |                     |      |                     |                     |                     |      |                     |                     |  |  |  |
| LOC100519314 |      |                     | 1.5  | $1 \times 10^{-10}$ |      |                     |  |  |      |                     |      |                     |                     |                     |      |                     |                     |  |  |  |
| LOC100520491 |      |                     | 1.3  | $1 \times 10^{-10}$ |      |                     |  |  |      |                     |      |                     |                     |                     |      |                     |                     |  |  |  |
| LOC100523310 |      |                     | 1.6  | $1 \times 10^{-10}$ |      |                     |  |  |      |                     |      | -1.2                | $4 \times 10^{-2}$  |                     |      |                     |                     |  |  |  |
| LOC100524999 |      |                     | 1.6  | $1 \times 10^{-10}$ |      |                     |  |  |      |                     |      | -1.3                | $4 \times 10^{-3}$  |                     |      |                     |                     |  |  |  |
| LOC100525452 |      |                     |      |                     |      |                     |  |  |      |                     |      | 1.7                 | $1 \times 10^{-3}$  |                     |      |                     |                     |  |  |  |
| LOC100525692 |      |                     |      |                     |      |                     |  |  |      |                     |      | -5.9                | $1 \times 10^{-10}$ |                     |      |                     |                     |  |  |  |
| LOC100526118 |      |                     |      |                     |      |                     |  |  | -1.7 | $2 \times 10^{-3}$  |      |                     |                     |                     |      |                     |                     |  |  |  |
| LOC100621559 |      |                     | 3.0  | $1 \times 10^{-10}$ |      |                     |  |  |      |                     |      |                     |                     |                     |      |                     |                     |  |  |  |
| LOC100623670 | -2.4 | $2 \times 10^{-6}$  | 6.2  | $1 \times 10^{-10}$ |      |                     |  |  |      |                     |      | 1.8                 | $1 \times 10^{-3}$  |                     |      |                     |                     |  |  |  |
| LOC100624149 |      |                     |      |                     |      |                     |  |  |      |                     | -4.5 | $1 \times 10^{-10}$ | 7.4                 | $1 \times 10^{-10}$ | -8.6 | $1 \times 10^{-10}$ |                     |  |  |  |
| LOC100624329 |      |                     |      |                     |      |                     |  |  |      |                     |      |                     |                     |                     | -3.2 | $1 \times 10^{-10}$ |                     |  |  |  |
| LOC100624590 |      |                     |      |                     |      |                     |  |  |      |                     | -5.7 | $1 \times 10^{-10}$ | 8.3                 | $1 \times 10^{-10}$ | -9.1 | $1 \times 10^{-10}$ |                     |  |  |  |
| LOC100624648 |      |                     |      |                     |      |                     |  |  |      |                     | 3.6  | $1 \times 10^{-10}$ | -1.6                | $1 \times 10^{-10}$ | 3.7  | $1 \times 10^{-10}$ |                     |  |  |  |
| LOC100624650 |      |                     |      |                     |      |                     |  |  |      |                     | 1.9  | $2 \times 10^{-7}$  |                     |                     |      |                     |                     |  |  |  |
| LOC100625207 |      |                     |      |                     |      |                     |  |  |      |                     | -5.8 | $1 \times 10^{-10}$ | 7.6                 | $1 \times 10^{-10}$ | -8.8 | $1 \times 10^{-10}$ |                     |  |  |  |
| LOC100626247 |      |                     | 1.5  | $1 \times 10^{-10}$ |      |                     |  |  |      |                     |      |                     |                     |                     |      |                     |                     |  |  |  |
| LOC100737113 |      |                     |      |                     |      |                     |  |  |      |                     |      | 1.7                 | $1 \times 10^{-3}$  |                     |      |                     |                     |  |  |  |
| LOC100737436 | 1.6  | $1 \times 10^{-10}$ | -1.6 | $1 \times 10^{-10}$ |      |                     |  |  | -3.7 | $1 \times 10^{-10}$ | -3.9 | $1 \times 10^{-10}$ |                     |                     |      |                     |                     |  |  |  |
| LOC100739325 |      |                     | 2.1  | $1 \times 10^{-10}$ |      |                     |  |  |      |                     |      |                     |                     |                     |      |                     |                     |  |  |  |
| LOC102160313 |      |                     | 2.5  | $1 \times 10^{-10}$ |      |                     |  |  |      |                     |      |                     |                     |                     |      |                     |                     |  |  |  |
| LOC102162336 |      |                     | 1.6  | $1 \times 10^{-10}$ |      |                     |  |  |      |                     |      |                     |                     |                     |      |                     |                     |  |  |  |
| LOC102163798 |      |                     |      |                     |      |                     |  |  |      |                     |      | -1.2                | $5 \times 10^{-3}$  |                     |      |                     |                     |  |  |  |
| LOC102164141 | -1.3 | $1 \times 10^{-10}$ | 1.6  | $1 \times 10^{-10}$ |      |                     |  |  |      |                     |      |                     |                     |                     |      |                     |                     |  |  |  |

|              |      |                     |      |                     |      |                     |      |                     |      |                     |      |                     |
|--------------|------|---------------------|------|---------------------|------|---------------------|------|---------------------|------|---------------------|------|---------------------|
| LOC106504234 |      |                     | 3.5  | $1 \times 10^{-10}$ |      |                     | 2.1  | $1 \times 10^{-2}$  |      |                     |      |                     |
| LOC106504372 |      |                     | 3.9  | $1 \times 10^{-10}$ |      |                     |      |                     | -2.5 | $1 \times 10^{-10}$ |      |                     |
| LOC106504562 | -1.2 | $1 \times 10^{-10}$ |      |                     |      |                     |      |                     |      |                     |      |                     |
| LOC106505355 |      |                     |      |                     |      |                     | 2.3  | $2 \times 10^{-3}$  | 1.9  | $6 \times 10^{-4}$  |      |                     |
| LOC110255229 |      |                     | -1.4 | $1 \times 10^{-10}$ |      |                     |      |                     |      |                     |      |                     |
| LOC110255257 |      |                     |      |                     |      |                     | -6.5 | $1 \times 10^{-10}$ | 6.8  | $1 \times 10^{-10}$ | -9.1 | $1 \times 10^{-10}$ |
| LOC110255320 |      |                     |      |                     |      |                     | -5.5 | $1 \times 10^{-10}$ | 7.5  | $1 \times 10^{-10}$ | -8.4 | $1 \times 10^{-10}$ |
| LOC110255360 |      |                     | 1.8  | $1 \times 10^{-10}$ |      |                     |      |                     |      |                     |      |                     |
| LOC110255361 |      |                     | 2.5  | $1 \times 10^{-10}$ |      |                     |      |                     |      |                     |      |                     |
| LOC110255657 | 1.7  | $1 \times 10^{-10}$ |      |                     |      |                     | -2.1 | $8 \times 10^{-6}$  |      |                     |      |                     |
| LOC110256043 |      |                     | 5.1  | $1 \times 10^{-10}$ |      |                     |      |                     | -1.8 | $8 \times 10^{-8}$  |      |                     |
| LOC110256714 |      |                     | 6.4  | $1 \times 10^{-10}$ |      |                     |      |                     | 2.4  | $3 \times 10^{-8}$  |      |                     |
| LOC110256816 |      |                     |      |                     |      |                     | 1.9  | $3 \times 10^{-2}$  |      |                     |      |                     |
| LOC110257240 |      |                     | 3.0  | $1 \times 10^{-10}$ |      |                     |      |                     |      |                     |      |                     |
| LOC110257381 | 1.4  | $1 \times 10^{-10}$ |      |                     |      |                     |      |                     |      |                     |      |                     |
| LOC110257883 |      |                     |      |                     |      |                     | -4.5 | $1 \times 10^{-7}$  | 6.9  | $1 \times 10^{-10}$ | -8.0 | $1 \times 10^{-10}$ |
| LOC110257894 |      |                     |      |                     |      |                     | -2.5 | $1 \times 10^{-5}$  | 3.2  | $1 \times 10^{-10}$ | -5.1 | $1 \times 10^{-10}$ |
| LOC110257896 |      |                     |      |                     |      |                     | -3.0 | $4 \times 10^{-4}$  | 4.2  | $1 \times 10^{-10}$ | -5.8 | $1 \times 10^{-10}$ |
| LOC110257905 |      |                     |      |                     |      |                     | -3.4 | $1 \times 10^{-10}$ | 6.8  | $1 \times 10^{-10}$ | -8.2 | $1 \times 10^{-10}$ |
| LOC110257919 |      |                     | 1.8  | $1 \times 10^{-10}$ |      |                     |      |                     |      |                     |      |                     |
| LOC110258060 |      |                     |      |                     |      |                     |      |                     |      |                     | 1.2  | $1 \times 10^{-10}$ |
| LOC110258195 |      |                     |      |                     |      |                     | -1.8 | $2 \times 10^{-2}$  |      |                     |      |                     |
| LOC110258326 |      |                     | 4.9  | $1 \times 10^{-10}$ |      |                     | -2.4 | $1 \times 10^{-10}$ |      |                     |      |                     |
| LOC110258673 | -1.7 | $5 \times 10^{-2}$  | 6.0  | $1 \times 10^{-10}$ |      |                     |      |                     | 2.1  | $8 \times 10^{-5}$  |      |                     |
| LOC110258921 |      |                     | 1.5  | $1 \times 10^{-10}$ |      |                     |      |                     |      |                     |      |                     |
| LOC110259088 |      |                     | 1.5  | $1 \times 10^{-10}$ |      |                     |      |                     |      |                     |      |                     |
| LOC110259530 |      |                     | 1.2  | $1 \times 10^{-9}$  |      |                     |      |                     |      |                     |      |                     |
| LOC110259864 |      |                     |      |                     |      |                     |      |                     | 1.7  | $4 \times 10^{-3}$  |      |                     |
| LOC110259983 |      |                     | 6.5  | $1 \times 10^{-10}$ |      |                     |      |                     | 2.3  | $4 \times 10^{-7}$  |      |                     |
| LOC110260608 |      |                     | -1.7 | $1 \times 10^{-10}$ | 1.4  | $1 \times 10^{-10}$ |      |                     |      |                     |      |                     |
| LOC110260829 | 1.6  | $1 \times 10^{-10}$ |      |                     |      |                     | -1.5 | $1 \times 10^{-8}$  |      |                     |      |                     |
| LOC396781    |      |                     | 5.4  | $1 \times 10^{-10}$ |      |                     | -1.2 | $3 \times 10^{-4}$  | 2.3  | $1 \times 10^{-10}$ |      |                     |
| LOX          |      |                     | -1.9 | $1 \times 10^{-10}$ |      |                     |      |                     |      |                     |      |                     |
| LY86         |      |                     | 2.4  | $1 \times 10^{-10}$ |      |                     |      |                     |      |                     |      |                     |
| LY9          |      |                     | 2.0  | $1 \times 10^{-10}$ |      |                     |      |                     |      |                     |      |                     |
| LYZ          | -1.8 | $1 \times 10^{-10}$ | 3.0  | $1 \times 10^{-10}$ | -2.1 | $1 \times 10^{-10}$ |      |                     | 3.5  | $1 \times 10^{-10}$ |      |                     |
| MARCO        |      |                     | 5.6  | $1 \times 10^{-10}$ |      |                     |      |                     |      |                     |      |                     |
| MEFV         |      |                     |      |                     |      |                     |      |                     | 1.9  | $3 \times 10^{-5}$  |      |                     |
| MX2          |      |                     | 2.9  | $1 \times 10^{-10}$ |      |                     |      |                     |      |                     |      |                     |
| NLRC5        |      |                     | 1.5  | $1 \times 10^{-10}$ |      |                     |      |                     |      |                     |      |                     |
| NPSR1        |      |                     | -1.6 | $1 \times 10^{-10}$ |      |                     |      |                     | -3.6 | $1 \times 10^{-10}$ |      |                     |
| OAS1         |      |                     |      |                     |      |                     | 1.3  | $1 \times 10^{-3}$  | -2.0 | $1 \times 10^{-10}$ |      |                     |
| OASL         | -1.2 | $7 \times 10^{-4}$  | 4.7  | $1 \times 10^{-10}$ |      |                     |      |                     | -1.3 | $4 \times 10^{-2}$  |      |                     |
| OLR1         |      |                     | 1.7  | $1 \times 10^{-10}$ | -1.3 | $1 \times 10^{-10}$ |      |                     |      |                     |      |                     |
| PARP12       |      |                     | 1.2  | $1 \times 10^{-10}$ |      |                     |      |                     |      |                     |      |                     |

|                   |      |                     |      |                     |      |                     |     |                     |      |                     |     |                     |
|-------------------|------|---------------------|------|---------------------|------|---------------------|-----|---------------------|------|---------------------|-----|---------------------|
| PARP14            |      |                     | 2.0  | $1 \times 10^{-10}$ |      |                     |     |                     |      |                     |     |                     |
| PARP9             |      |                     | 1.3  | $1 \times 10^{-10}$ |      |                     |     |                     |      |                     |     |                     |
| PI15              | 1.2  | $1 \times 10^{-10}$ |      |                     | -1.6 | $1 \times 10^{-10}$ |     |                     | -1.4 | $1 \times 10^{-2}$  |     |                     |
| PILRA             |      |                     | 1.6  | $1 \times 10^{-10}$ |      |                     |     |                     | 1.6  | $8 \times 10^{-3}$  |     |                     |
| PLAC8             |      |                     | 2.4  | $1 \times 10^{-10}$ |      |                     | 1.6 | $3 \times 10^{-4}$  | -1.4 | $2 \times 10^{-5}$  |     |                     |
| PNPLA4-2          |      |                     |      |                     |      |                     |     |                     | -1.7 | $1 \times 10^{-4}$  |     |                     |
| POSTN             |      |                     |      |                     |      |                     | 1.5 | $3 \times 10^{-3}$  |      |                     |     |                     |
| PRF1              |      |                     | 2.7  | $1 \times 10^{-10}$ |      |                     |     |                     |      |                     |     |                     |
| PSMB8             |      |                     | 1.6  | $1 \times 10^{-10}$ |      |                     |     |                     |      |                     |     |                     |
| PSMB9             |      |                     | 1.8  | $1 \times 10^{-10}$ |      |                     |     |                     |      |                     |     |                     |
| PTPN7             |      |                     | 1.5  | $1 \times 10^{-10}$ |      |                     |     |                     |      |                     |     |                     |
| PTPRC             |      |                     | 1.5  | $1 \times 10^{-10}$ |      |                     |     |                     |      |                     |     |                     |
| PYURF             | 5.6  | $1 \times 10^{-10}$ | 5.6  | $1 \times 10^{-10}$ | -5.4 | $1 \times 10^{-10}$ | 8.2 | $1 \times 10^{-10}$ | -2.8 | $1 \times 10^{-10}$ | 4.2 | $1 \times 10^{-10}$ |
| RHBDF2            |      |                     | 1.6  | $1 \times 10^{-10}$ |      |                     |     |                     |      |                     |     |                     |
| RSAD2             |      |                     | 4.5  | $1 \times 10^{-10}$ |      |                     | 1.2 | $4 \times 10^{-4}$  |      |                     |     |                     |
| RUNX3             |      |                     | 1.9  | $1 \times 10^{-10}$ |      |                     |     |                     |      |                     |     |                     |
| S100A4            |      |                     |      |                     | -1.2 | $1 \times 10^{-10}$ |     |                     |      |                     |     |                     |
| SAA3              | -2.7 | $1 \times 10^{-7}$  | 6.2  | $1 \times 10^{-10}$ | -2.5 | $5 \times 10^{-5}$  |     |                     | 2.8  | $1 \times 10^{-10}$ |     |                     |
| SAMSN1            |      |                     | 1.4  | $1 \times 10^{-10}$ |      |                     |     |                     |      |                     |     |                     |
| SDS               |      |                     |      |                     |      |                     |     |                     | 1.8  | $1 \times 10^{-6}$  |     |                     |
| SELE              |      |                     | 3.0  | $1 \times 10^{-10}$ | -1.5 | $1 \times 10^{-10}$ |     |                     | 2.9  | $1 \times 10^{-10}$ |     |                     |
| SELL              |      |                     |      |                     |      |                     |     |                     | 1.7  | $5 \times 10^{-5}$  |     |                     |
| SERPINE1          |      |                     | 1.2  | $1 \times 10^{-10}$ |      |                     |     |                     | 2.5  | $1 \times 10^{-10}$ |     |                     |
| SFRP5             | 1.3  | $1 \times 10^{-10}$ |      |                     | -1.3 | $1 \times 10^{-10}$ |     |                     | -1.4 | $4 \times 10^{-2}$  |     |                     |
| SIGLEC1           |      |                     | 1.8  | $1 \times 10^{-10}$ |      |                     |     |                     |      |                     |     |                     |
| SIGLEC14          |      |                     |      |                     |      |                     |     |                     |      |                     |     |                     |
| SLA-2             |      |                     | 1.7  | $1 \times 10^{-10}$ |      |                     |     |                     |      |                     |     |                     |
| SLA- <sup>3</sup> |      |                     | 1.3  | $1 \times 10^{-10}$ |      |                     |     |                     |      |                     |     |                     |
| SLA- <sup>5</sup> | -1.3 | $1 \times 10^{-10}$ | 1.7  | $1 \times 10^{-10}$ |      |                     |     |                     |      |                     |     |                     |
| SLA-DMA           |      |                     | 1.6  | $1 \times 10^{-10}$ |      |                     |     |                     |      |                     |     |                     |
| SLA-DOA           |      |                     | 3.4  | $1 \times 10^{-10}$ |      |                     |     |                     | -2.3 | $4 \times 10^{-5}$  |     |                     |
| SLA-DQA1          |      |                     | 3.2  | $1 \times 10^{-10}$ | -1.2 | $1 \times 10^{-10}$ | 1.3 | $7 \times 10^{-4}$  | -1.4 | $6 \times 10^{-8}$  |     |                     |
| SLA-DQB1          |      |                     | 2.6  | $1 \times 10^{-10}$ |      |                     |     |                     | -1.5 | $1 \times 10^{-10}$ |     |                     |
| SLA-DRA           |      |                     | 3.8  | $1 \times 10^{-10}$ | -1.3 | $1 \times 10^{-10}$ |     |                     | -1.9 | $1 \times 10^{-10}$ |     |                     |
| SLA-DRB1          |      |                     | 2.3  | $1 \times 10^{-10}$ |      |                     | 1.5 | $3 \times 10^{-4}$  | -1.2 | $2 \times 10^{-4}$  |     |                     |
| SLC13A4           | 1.3  | $1 \times 10^{-10}$ |      |                     |      |                     |     |                     |      |                     |     |                     |
| SLC5A5            | 1.8  | $1 \times 10^{-10}$ | -1.7 | $1 \times 10^{-10}$ |      |                     |     |                     | -1.5 | $2 \times 10^{-3}$  |     |                     |
| SOCS3             |      |                     | 1.5  | $1 \times 10^{-10}$ |      |                     |     |                     | 2.6  | $1 \times 10^{-10}$ |     |                     |
| SPN               |      |                     | 1.3  | $1 \times 10^{-10}$ |      |                     |     |                     |      |                     |     |                     |
| SRGN              |      |                     | 1.3  | $1 \times 10^{-10}$ |      |                     |     |                     | 1.5  | $1 \times 10^{-10}$ |     |                     |
| STX11             |      |                     | 2.4  | $1 \times 10^{-10}$ |      |                     |     |                     |      |                     |     |                     |
| TAP1              |      |                     | 1.5  | $1 \times 10^{-10}$ |      |                     |     |                     |      |                     |     |                     |
| TAP2              |      |                     | 1.2  | $1 \times 10^{-10}$ |      |                     |     |                     |      |                     |     |                     |
| TBX21             |      |                     | 2.7  | $1 \times 10^{-10}$ | -1.4 | $5 \times 10^{-6}$  |     |                     |      |                     |     |                     |
| TGM1              |      |                     |      |                     |      |                     |     |                     | 1.7  | $1 \times 10^{-3}$  |     |                     |

|         |     |                     |      |                     |                     |                     |     |                    |      |                     |
|---------|-----|---------------------|------|---------------------|---------------------|---------------------|-----|--------------------|------|---------------------|
| THBS1   |     |                     |      |                     |                     |                     |     |                    |      |                     |
| TIMP1   |     |                     |      |                     | -1.3                | $1 \times 10^{-10}$ | 1.2 | $7 \times 10^{-4}$ | 1.5  | $1 \times 10^{-10}$ |
| TMEM156 |     |                     | 1.2  | $1 \times 10^{-10}$ |                     |                     |     |                    |      |                     |
| TNMD    | 1.4 | $1 \times 10^{-10}$ | -1.3 | $1 \times 10^{-10}$ | -1.6                | $1 \times 10^{-10}$ |     |                    | -1.4 | $2 \times 10^{-2}$  |
| TTR     |     |                     |      |                     |                     |                     |     |                    | 2.1  | $2 \times 10^{-9}$  |
| UBA7    |     |                     | 1.3  | $1 \times 10^{-10}$ |                     |                     |     |                    |      |                     |
| UBD     |     |                     | 4.1  | $1 \times 10^{-10}$ |                     |                     | 1.7 | $1 \times 10^{-2}$ |      |                     |
| UNC93B1 |     |                     |      | 1.4                 | $1 \times 10^{-10}$ |                     |     |                    |      |                     |
| USP18   |     |                     |      | 2.0                 | $1 \times 10^{-10}$ |                     |     |                    |      |                     |
| XAF1    |     |                     |      | 1.7                 | $1 \times 10^{-10}$ |                     |     |                    |      |                     |
| ZBP1    |     |                     |      | 2.1                 | $1 \times 10^{-10}$ |                     |     |                    |      |                     |

**Supplemental Table S2.** Log2(fold change) of pairwise contrasts between treatment groups for genes in the cell adhesion molecules pathway.

| Gene    | MC vs SC <sup>1</sup> | MP vs MP | MC vs SP | MP vs SC | SP vs SC | MP vs SP |
|---------|-----------------------|----------|----------|----------|----------|----------|
| CD2     | -0.01                 | 2.29     | -4.21    | 2.29     | 4.21     | -1.92    |
| CD22    | 0.49                  | 0.29     | -0.85    | 0.77     | 1.34     | -0.56    |
| CD274   | 0.24                  | 0.54     | -1.92    | 0.78     | 2.17     | -1.39    |
| CD4     | 0.03                  | -0.33    | 0.09     | -0.30    | -0.06    | -0.23    |
| CD40    | -0.24                 | 0.52     | -1.07    | 0.28     | 0.83     | -0.55    |
| CD6     | -0.39                 | 1.42     | -2.84    | 1.02     | 2.44     | -1.42    |
| CD80    | 0.38                  | -0.01    | 0.09     | 0.38     | 0.29     | 0.09     |
| CD8A    | 0.10                  | 0.35     | -0.69    | 0.45     | 0.79     | -0.34    |
| CDH1    | -1.86                 | 0.16     | -0.53    | -1.70    | -1.32    | -0.38    |
| CDH2    | 0.36                  | -0.14    | 0.02     | 0.22     | 0.34     | -0.12    |
| CLDN6   | -1                    | 0.33     | -0.50    | -0.67    | -0.50    | -0.17    |
| CNTN1   | 0.33                  | -0.12    | 0.18     | 0.21     | 0.14     | 0.06     |
| F11R    | 0.19                  | 0.08     | -0.15    | 0.27     | 0.34     | -0.07    |
| ICAM1   | -0.26                 | 0.47     | -1.15    | 0.21     | 0.88     | -0.67    |
| ICAM2   | -0.41                 | 0.49     | -1.14    | 0.07     | 0.73     | -0.65    |
| ICAM3   | -0.49                 | 0.34     | -0.71    | -0.15    | 0.22     | -0.38    |
| ITGA4   | 0.48                  | 0.31     | -1.09    | 0.79     | 1.57     | -0.78    |
| ITGA6   | 0.19                  | -0.21    | 0.13     | -0.02    | 0.06     | -0.08    |
| ITGA8   | 0.34                  | -0.19    | 0.07     | 0.15     | 0.27     | -0.11    |
| ITGAL   | 0.01                  | 0.20     | -0.46    | 0.22     | 0.47     | -0.26    |
| ITGAM   | -0.04                 | 0.39     | -0.42    | 0.35     | 0.38     | -0.03    |
| ITGB2   | 0.07                  | 0.20     | -0.61    | 0.27     | 0.68     | -0.41    |
| ITGB7   | -0.14                 | 1.41     | -2.58    | 1.28     | 2.45     | -1.17    |
| ITGB8   | 0.55                  | -0.17    | 0.35     | 0.38     | 0.20     | 0.18     |
| L1CAM   | 0.13                  | -0.07    | -0.04    | 0.06     | 0.18     | -0.12    |
| MADCAM1 | -0.44                 | 0.57     | -0.80    | 0.12     | 0.36     | -0.23    |
| NCAM2   | 0.35                  | -0.11    | 0.10     | 0.23     | 0.25     | -0.01    |
| NEGR1   | 0.29                  | -0.12    | -0.01    | 0.17     | 0.29     | -0.12    |
| NFASC   | 0.49                  | -0.16    | 0.36     | 0.33     | 0.13     | 0.21     |
| NLGN1   | 0.24                  | -0.11    | 0.10     | 0.13     | 0.14     | -0.01    |
| NRCAM   | 0.29                  | -0.14    | 0.12     | 0.15     | 0.17     | -0.02    |
| NRXN3   | 0.20                  | -0.08    | -0.02    | 0.12     | 0.22     | -0.10    |
| NTNG1   | 0.17                  | -0.06    | -0.15    | 0.11     | 0.31     | -0.21    |
| PTPRC   | 0.24                  | 0.91     | -1.93    | 1.15     | 2.17     | -1.02    |

|         |       |       |       |       |      |       |
|---------|-------|-------|-------|-------|------|-------|
| SDC1    | -0.28 | -0.01 | -0.33 | -0.28 | 0.06 | -0.33 |
| SELE    | -0.84 | 2.26  | -4.50 | 1.43  | 3.67 | -2.24 |
| SELL    | 0.05  | 0.17  | -2.07 | 0.22  | 2.12 | -1.90 |
| SELP    | -0.40 | 1.02  | -1.48 | 0.62  | 1.08 | -0.46 |
| SELPLG  | -0.04 | 0.27  | -0.29 | 0.23  | 0.25 | -0.02 |
| SIGLEC1 | -0.19 | 1.25  | -2.45 | 1.05  | 2.26 | -1.21 |
| SPN     | -0.29 | 1.02  | -1.79 | 0.73  | 1.50 | -0.77 |
| TIGIT   | -0.01 | 0.19  | -0.67 | 0.18  | 0.66 | -0.48 |
| VCAN    | 0.44  | -0.12 | 0.17  | 0.33  | 0.27 | 0.06  |

<sup>1</sup>MC = morphin × 10-treated Control group, SC = salin × 10-treated Control group, MP = morphin × 10-treated MIA-exposed group, SP = salin × 10-treated MIA-exposed group.

**Supplemental Table S3.** Log2(fold change) of pairwise contrasts between treatment groups for genes in the long-term depression pathway.

| Gene    | MC vs SC <sup>1</sup> | MP vs MP | MC vs SP | MP vs SC | SP vs SC | MP vs SP |
|---------|-----------------------|----------|----------|----------|----------|----------|
| BRAF    | 0.29                  | -0.08    | 0.11     | 0.21     | 0.19     | 0.02     |
| CACNA1A | 0.26                  | -0.06    | 0.06     | 0.20     | 0.20     | -0.01    |
| GNA13   | 0.21                  | -0.05    | 0.05     | 0.16     | 0.16     | -0.01    |
| GNAI1   | 0.28                  | -0.12    | 0.06     | 0.16     | 0.22     | -0.05    |
| GNAQ    | 0.42                  | -0.13    | 0.08     | 0.29     | 0.34     | -0.05    |
| GRIA1   | 0.15                  | -0.07    | 0.02     | 0.08     | 0.13     | -0.05    |
| GRIA2   | 0.46                  | -0.15    | 0.07     | 0.31     | 0.39     | -0.08    |
| GRIA3   | 0.14                  | -0.04    | -0.01    | 0.10     | 0.15     | -0.05    |
| GRID2   | 0.30                  | -0.12    | 0.27     | 0.18     | 0.03     | 0.15     |
| GRM1    | 0.45                  | -0.11    | -0.06    | 0.33     | 0.51     | -0.17    |
| GUCY1A2 | 0.53                  | -0.22    | 0.14     | 0.31     | 0.39     | -0.08    |
| IGF1R   | 0.30                  | -0.03    | 0.05     | 0.27     | 0.25     | 0.02     |
| ITPR1   | 0.26                  | -0.04    | -0.01    | 0.22     | 0.27     | -0.05    |
| ITPR2   | 0.07                  | 0.01     | 0.14     | 0.07     | -0.07    | 0.14     |
| ITPR3   | 0.19                  | -0.06    | 0.28     | 0.13     | -0.08    | 0.22     |
| KRAS    | 0.46                  | -0.19    | 0.11     | 0.27     | 0.35     | -0.08    |
| LYN     | 0.10                  | -0.03    | -0.05    | 0.07     | 0.15     | -0.08    |
| MAP2K1  | -0.06                 | 0.05     | -0.13    | -0.02    | 0.06     | -0.08    |
| MAPK1   | 0.10                  | -0.05    | -0.03    | 0.05     | 0.13     | -0.08    |
| PLA2G4A | 0.05                  | 0.10     | -0.36    | 0.15     | 0.41     | -0.26    |
| PLA2G4B | 0.16                  | 0.07     | 0.07     | 0.23     | 0.10     | 0.13     |
| PLA2G4E | 0.21                  | -0.12    | -0.02    | 0.08     | 0.22     | -0.14    |
| PLCB1   | 0.19                  | -0.07    | 0.02     | 0.12     | 0.17     | -0.05    |
| PLCB2   | 0.15                  | 0.03     | -0.20    | 0.17     | 0.34     | -0.17    |
| PPP1R17 | 0.08                  | -0.14    | 0.02     | -0.06    | 0.06     | -0.12    |
| PRKCB   | 0.09                  | -0.06    | -0.02    | 0.03     | 0.11     | -0.08    |
| PRKG1   | 0.30                  | -0.12    | 0.16     | 0.18     | 0.14     | 0.05     |
| PRKG2   | 0.35                  | -0.01    | 0.32     | 0.33     | 0.02     | 0.31     |
| RYR1    | 0.52                  | 0.36     | -0.04    | 0.87     | 0.56     | 0.32     |

<sup>1</sup>MC = morphin × 10-treated Control group, SC = salin × 10-treated Control group, MP = morphin × 10-treated MIA-exposed group, SP = salin × 10-treated MIA-exposed group.

CM vs CS

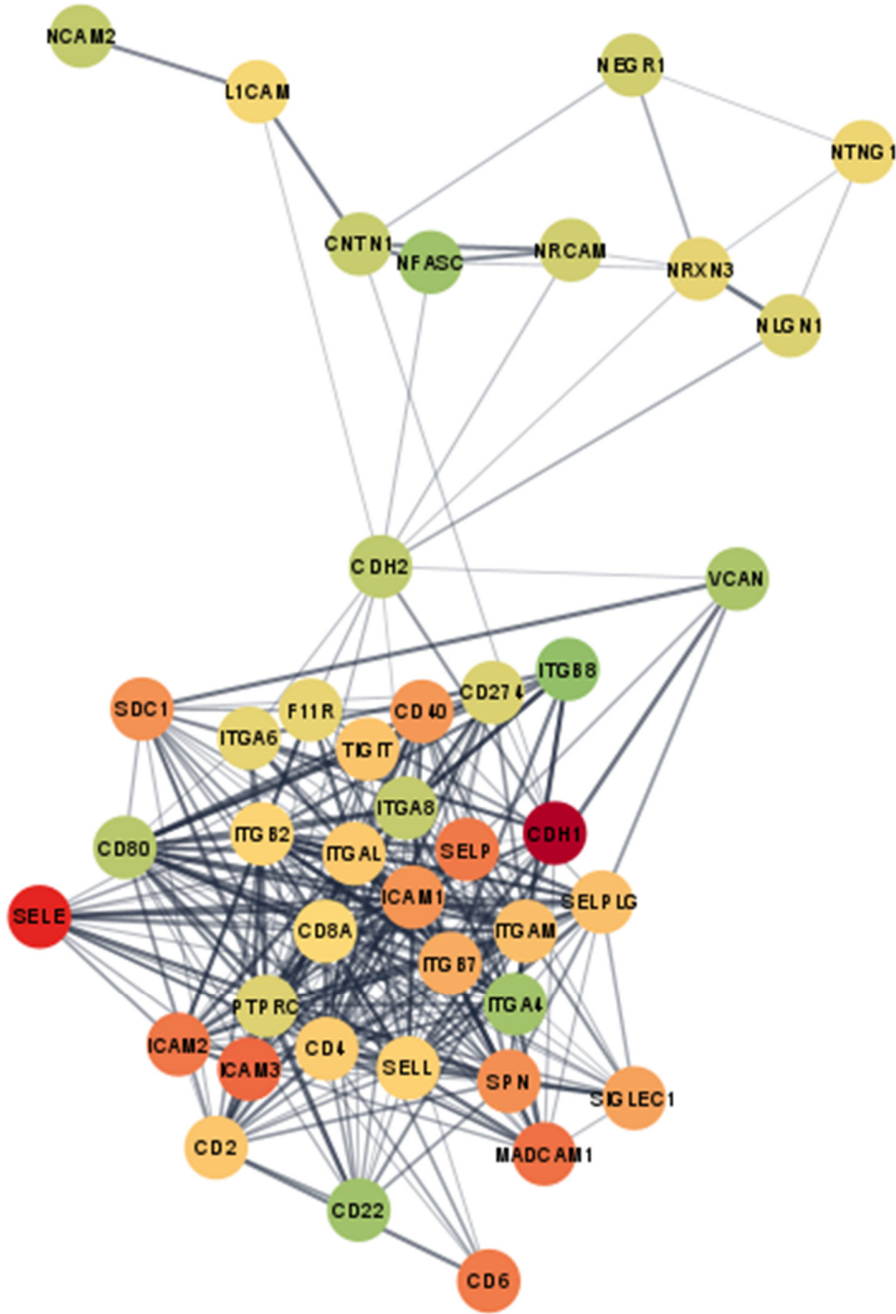



## PM vs CM

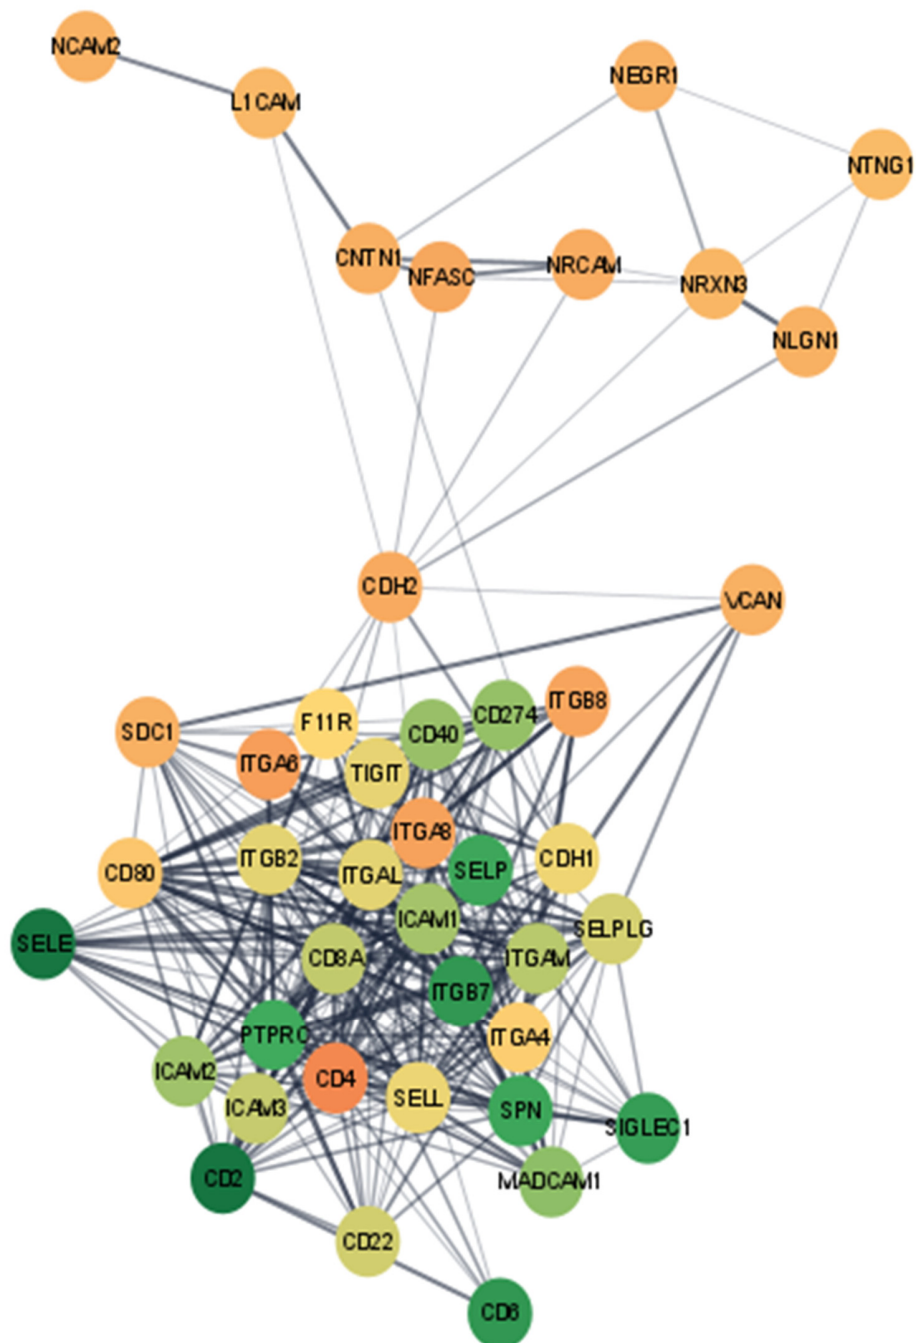

CM vs PS

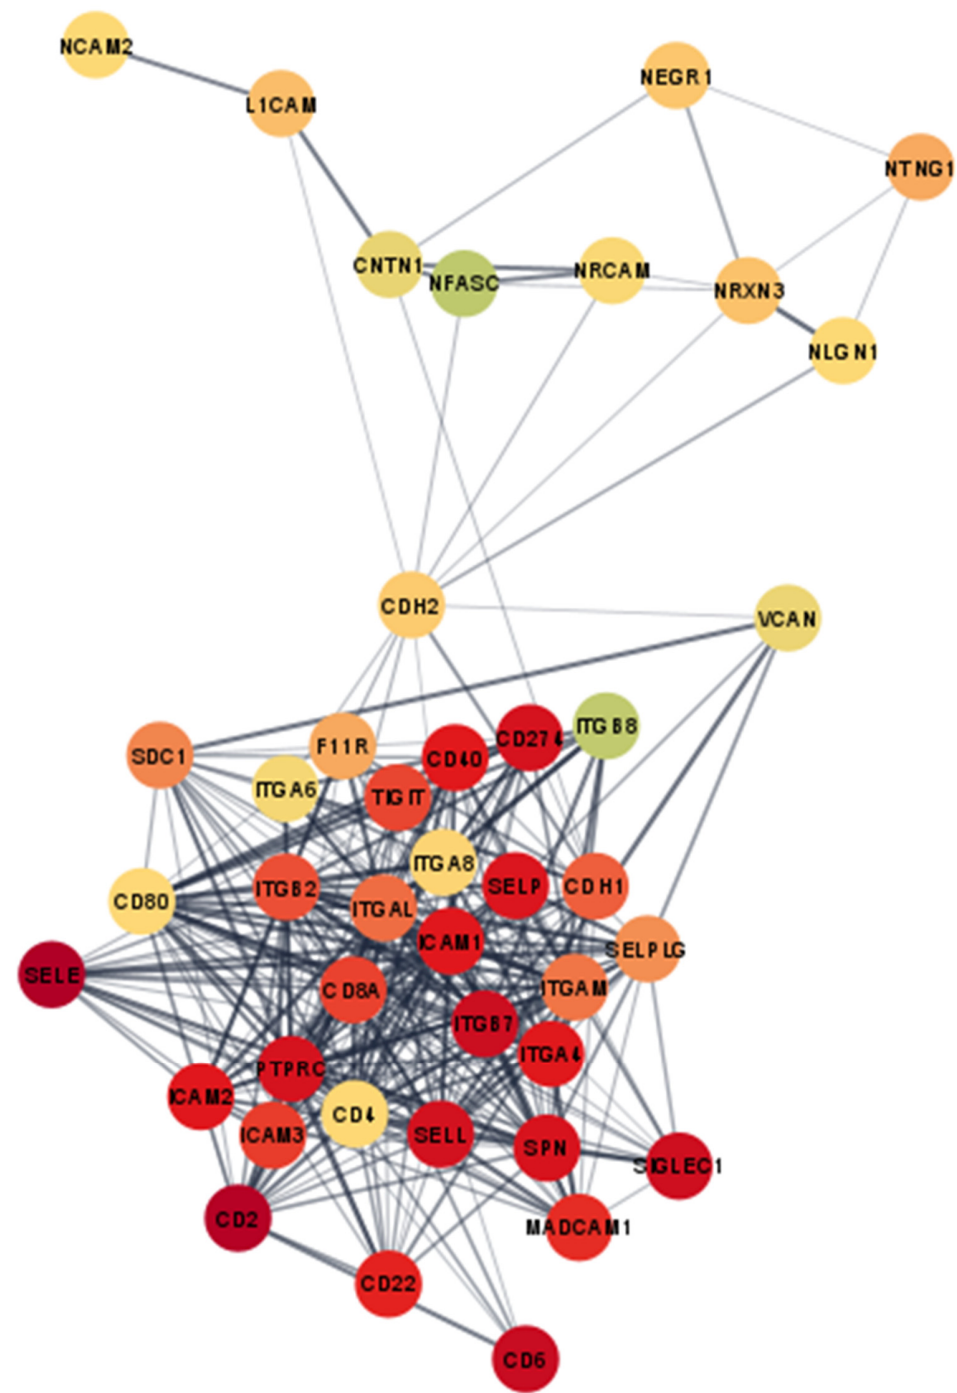

## PM vs CS

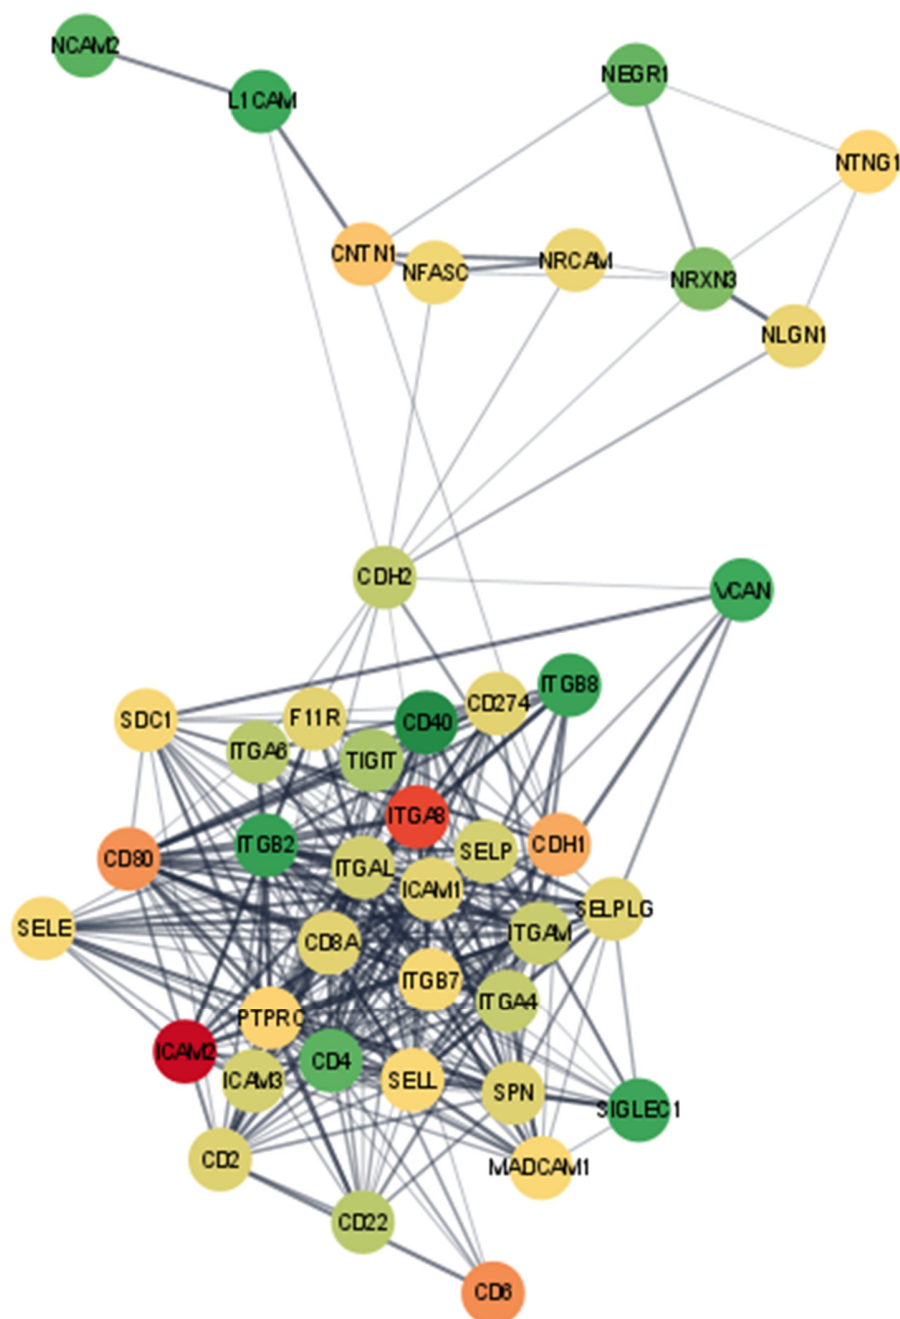

PS vs CS

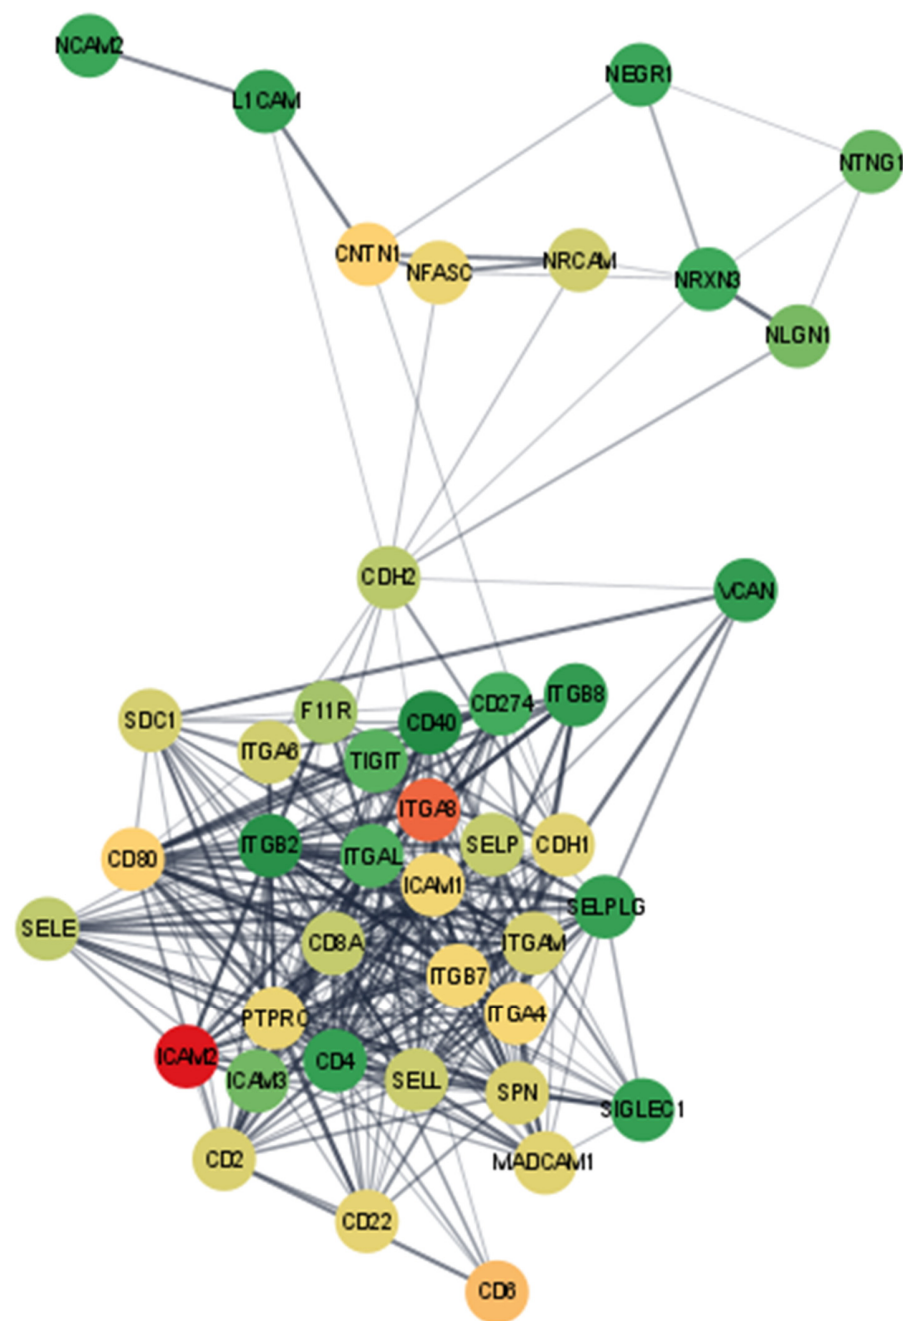

PM vs PS

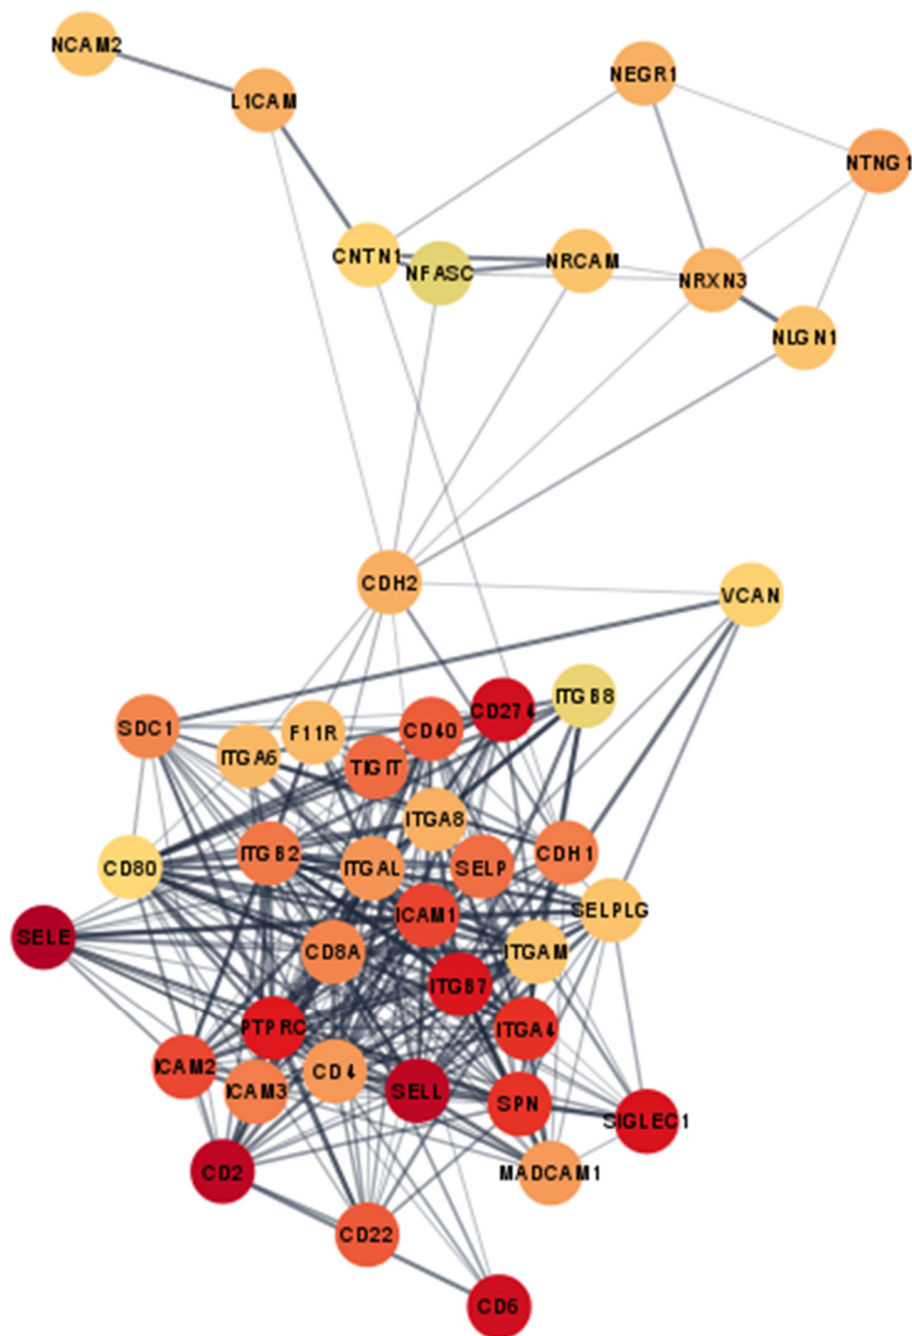

**Supplemental Figure S1.** Complete gene networks for the cellular adhesion molecules pathway. Nodes = genes; edges = STRING database connections; node color = differential expression between groups characterized by opioid (M=morphine or S=saline) followed by MIA exposure (C=control or P=viral MIA) from red (under-expressed in first vs second group, to yellow, and green (over-expressed in first versus second group. Networks: MC vs SC = morphin × 10-treated Control vs salin × 10-treated Control; MP vs MC = morphin × 10-treated MIA vs morphin × 10-treated Control; MC vs SP = morphin × 10-treated Control vs salin × 10-treated MIA; MP vs SC = morphin × 10-treated MIA vs salin × 10-treated Control; SP vs SC = salin × 10-treated MIA vs salin × 10-treated Control; and MP vs SP = morphin × 10-treated MIA vs salin × 10-treated MIA.

## CM vs CS



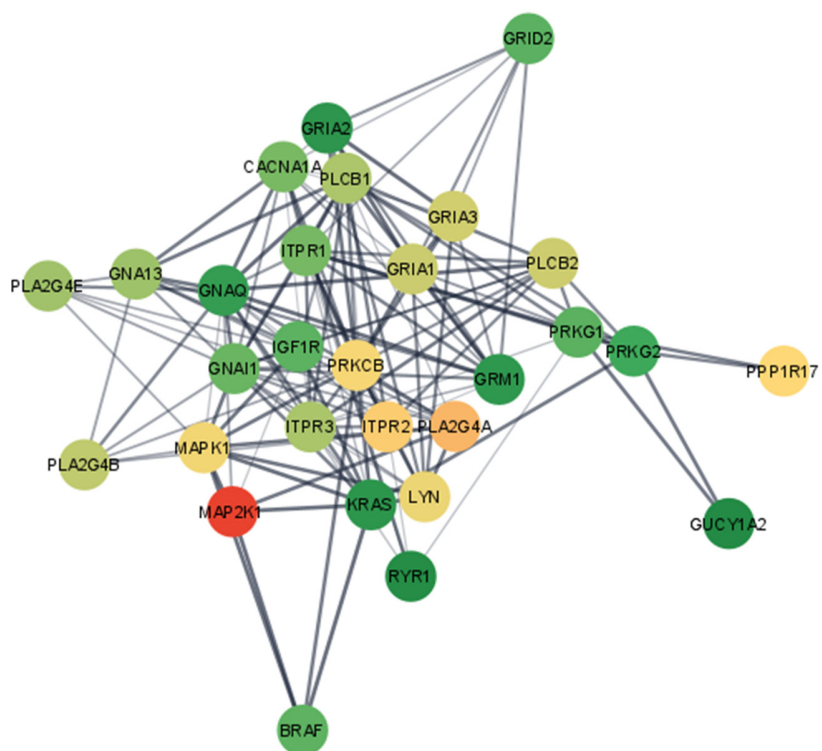

**PM vs CM**

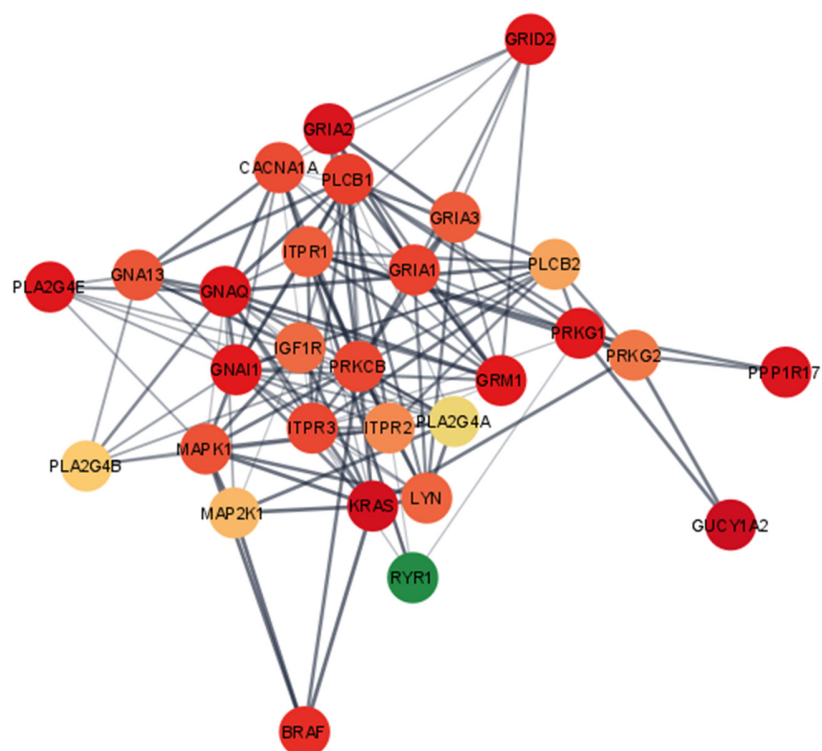

**CM vs PS**

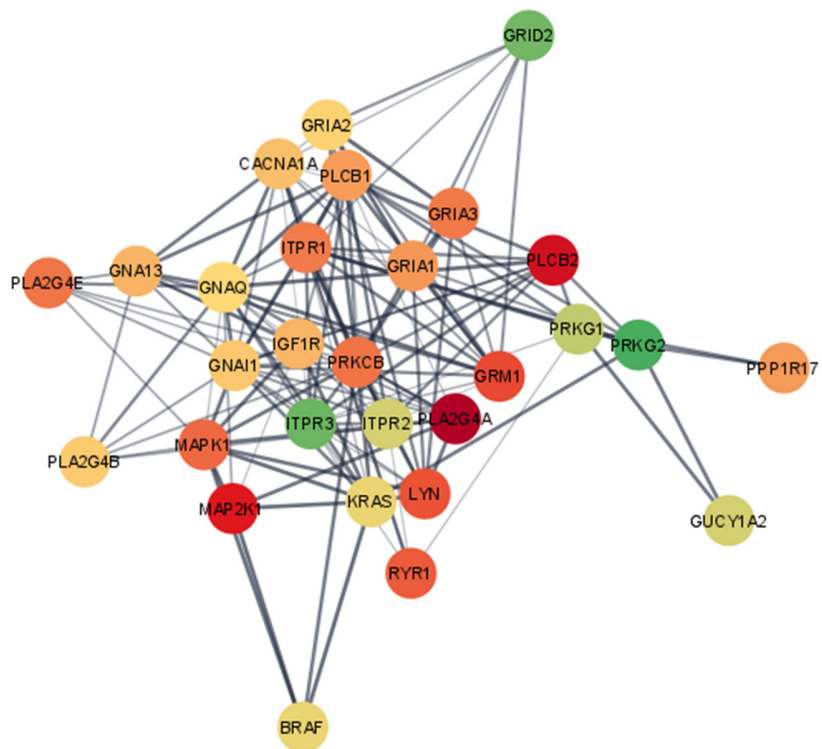

PM vs CS

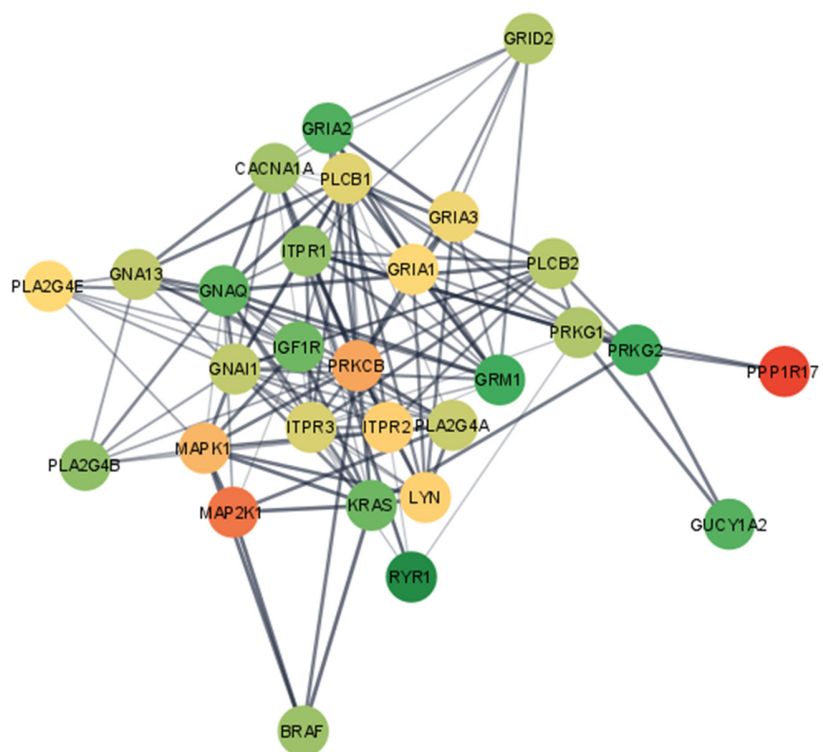

PS vs CS

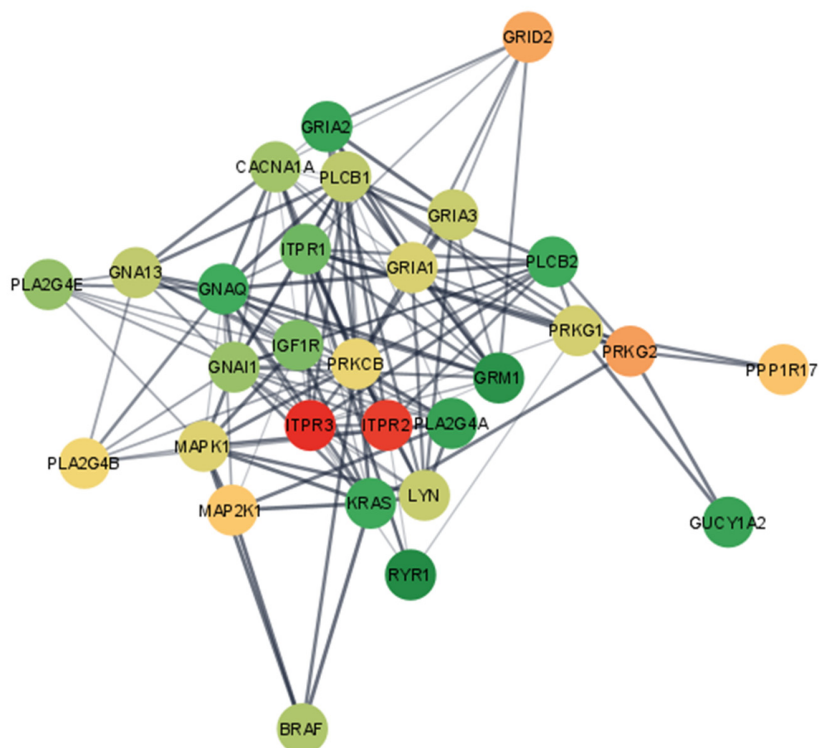

# PM vs PS

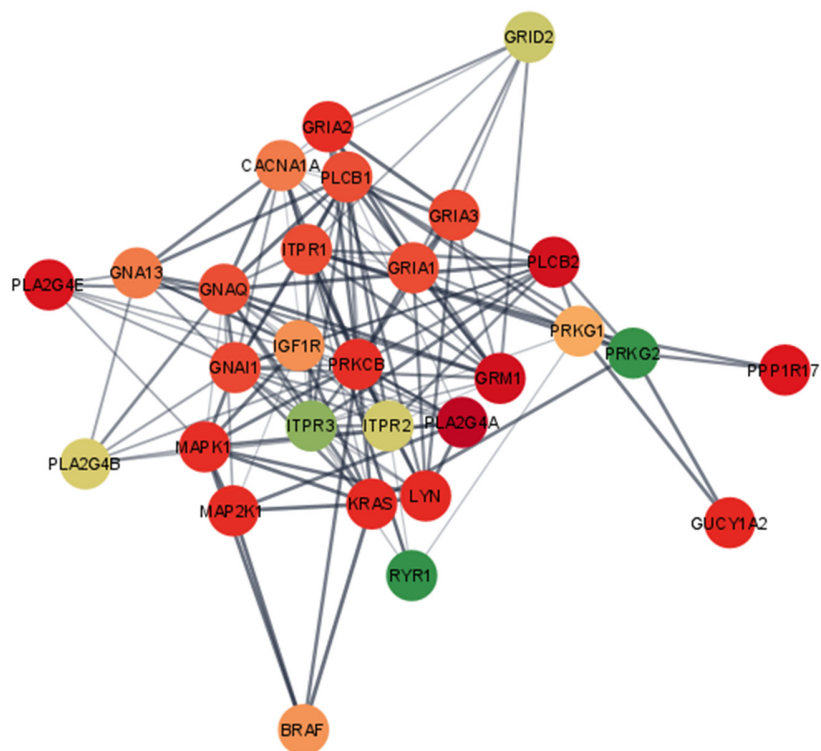

**Supplemental Figure S2.** Complete gene networks for the long-term depression pathway. Nodes = genes; edges = STRING database connections; node color = differential expression between groups characterized by opioid (M=morphine or



S=saline) followed by MIA exposure (C=control or P=viral MIA) from red (under-expressed in first vs second group, to yellow, and green (over-expressed in first versus second group. Networks: MC vs SC = morphin × 10-treated Control vs salin × 10-treated Control; MP vs MC = morphin × 10-treated MIA vs morphin × 10-treated Control; MC vs SP = morphin × 10-treated Control vs salin × 10-treated MIA; MP vs SC = morphin × 10-treated MIA vs salin × 10-treated Control; SP vs SC = salin × 10-treated MIA vs salin × 10-treated Control; and MP vs SP = morphin × 10-treated MIA vs salin × 10-treated MIA.
